# Supplementary material for: Strongly red-fluorescent novel donor–π-bridge–acceptor–π-bridge–donor (D–π–A–π–D) type 2,1,3-benzothiadiazoles with enhanced two-photon absorption cross-sections
Source: Royal Society of Chemistry journal article supplement (doi:10.1039/b410016f), 2004-01-01
Supplement: b410016f.doc [file b410016f.doc]

Supplementary Information for

Strongly red-fluorescent novel donor--bridge-acceptor--bridge-donor (D--A--D) type 2,1,3-benzothiadiazoles with enhanced two-photon absorption cross-sections

Shin-ichiro Kato,*a* Taisuke matsumoto,*b* Tsutomu Ishi-i,*b* Thies Thiemann,*b* Motoyuki Shigeiwa,*c* Hideki Gorohmaru,*c* Shuichi Maeda,*c* Yoshiro Yamashita*d* and Shuntaro Mataka**b*

*a**Interdisciplinary Graduate School of Engineering Sciences, Kyushu University, 6-1 Kasuga-koh-en, Kasuga 816-8580, Japan,*

*b**Institute for Materials Chemistry and Engineering (IMCE), Kyushu University, 6-1 Kasuga-koh-en, Kasuga 816-8580, Japan,*

*c**Mitsubishi Chemical Group Science and Technology Research Center, Inc., 1000 Kamoshida-cho, Aoba-ku, Yokohama 227-8502, Japan,*

*d Interdisciplinary Graduate School of Science and Engineering, Tokyo Institute of Technology, Nagatsuta, Midori-ku, Yokohama 226-8502, Japan,*

**General.** All melting points are uncorrected. IR spectra were recorded on a JASCO FT/IR-470 plus Fourier Transform Infrared Spectrometer and measured as KBr pellets. 1H NMR spectra were determined with a JEOL EX-270, and GSX-270 spectrometer. Residual solvent protons were used as internal standard and chemical shifts () are given relative to tetramethylsilane (TMS). The coupling constants (*J*) are given in hertz. Elemental analysis was performed at the Elemental Analytical Center, Kyushu University. EI-MS spectra were recorded with a JEOL JMS-70 mass spectrometer at 70 eV using a direct inlet system. FAB-MS were recorded with a JEOL JMS-70 mass spectrometer with *m*-nitrobenzyl alcohol as a matrix. UV/Vis spectra were measured on a JASCO V-570 spectrophotometer in a 1 cm width cell. Fluorescence spectra were measured on a HITACHI F-4500 fluorescence spectrophotometer in a 1 cm width cell. Gel permeation chromatography (GPC) was performed with a Japan Analytical Industry Co., Ltd LC-908 using JAIGEL-1H column (20 x 600 mm) and JAIGEL-2H column (20 x 600 mm) eluting with chloroform (3.5 mL/min). Analytical TLC was carried out on silica gel coated on aluminum foil (Merck 60 F254). Column chromatography was carried out on silica gel (Wako C-300 or KANTO 60N). THF was distilled from sodium and benzophenone under an argon atmosphere just before use. Benzene was dried with 4A molecular sieve over night before use. Compound **1** was prepared according to a method described previously.1

**Synthetic Procedures and Characterization**


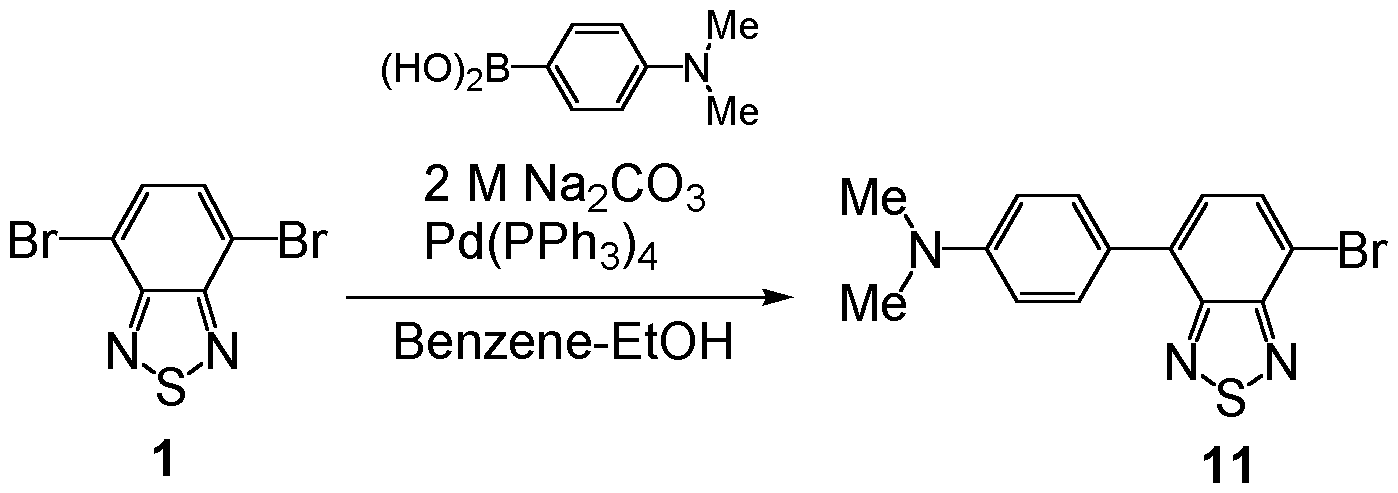


**4-Bromo-7-(4-dimethylaminophenyl)-2,1,3-benzothiadizole (11).** To a mixture of **1** (1.00 g, 3.40 mmol) and tetrakis(triphenylphophine)palladium (118 mg, 0.10 mmol) in benzene (50 mL) were added ethanol (5 mL) solution of 4-dimethylaminophenylboronic acid (400 mg, 3.40 mmol) and 2 M sodium carbonate solution (25 mL) at 60 oC under an argon atmosphere. After the reaction mixture was heated at 85 oC for 12 h, it was poured into water (120 mL) and extracted with toluene (40 mL x 3). The combined organic layers were evaporated in vacuo to dryness after dried over anhydrous magnesium sulfate. The residue was purified by silica gel column chromatography (Wako C-300) eluting with chloroform/*n*-hexane (2:5, v/v) and recrystallization from chloroform/*n*-hexane to give **11** in 68% yield (772 mg, 2.31 mmol) as orange prisms: mp 179-180 oC; IR (KBr) max 1609, 1513, 1479, 1362, 1200, 884, 810 cm-1; 1H NMR (CDCl3) 3.05 (s, 6 H, CH3), 6.86 (d, *J* = 8.9 Hz, 2 H, ArH), 7.51 (d, *J* = 7.6 Hz, 1 H, ArH), 7.83-7.88 (m, 3 H, ArH); EI-MS (positive) 333, 335 (M+). Anal. Calcd for C14H12N3BrS: C, 50.31; H, 3.62; N, 12.57. Found: C, 50.31; H, 3.60; N, 12.55.


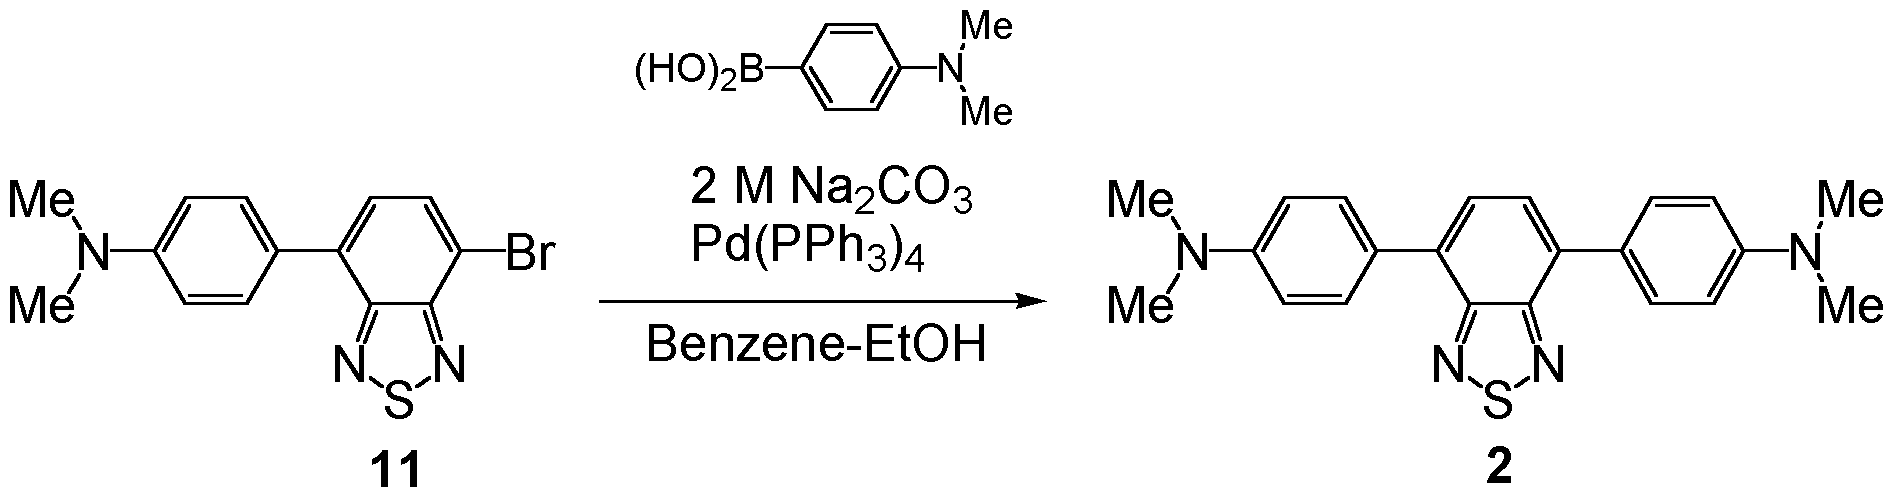


**4,7-Bis(4-dimethylaminophenyl)-2,1,3-benzothiaziazole (2).** To a mixture of **11** (200 mg, 0.60 mmol) and tetrakis(triphenylphophine)palladium (21 mg, 0.018 mmol) in benzene (20 mL) was added ethanol (2 mL) solution of 4-dimethylaminophenylboronic acid(138 mg, 0.83 mmol) and 2 M sodium carbonate solution (25 mL) at 60 oC under an argon atmosphere. After the mixture was heated at 85 oC, the reaction mixture was poured into water (100 mL). The precipitates were collected by filtration and washed well with water and benzene to give **2** in 58% yield (130 mg, 0.35 mmol) as red needles. An analytical sample was obtained by gel permeation chromatography eluting with chloroform: mp 217-218 oC; IR (KBr) max 1611, 1528, 1478, 1444, 1364, 1229, 1202, 1113, 811 cm-1; 1HNMR (CDCl3) δ 3.04 (s, 12 H, CH3), 6.89 (d, *J* = 8.5 Hz, 4 H, ArH), 7.68 (s, 4 H, ArH), 7.91 (d, *J*= 8.5 Hz, 2 H, ArH); FAB-MS (NBA, positive) 374 (M+). Anal. Calcd for C22H22N4S: C, 70.56; H, 5.92; N, 14.96. Found: C, 70.31; H, 5.68; N, 15.06.


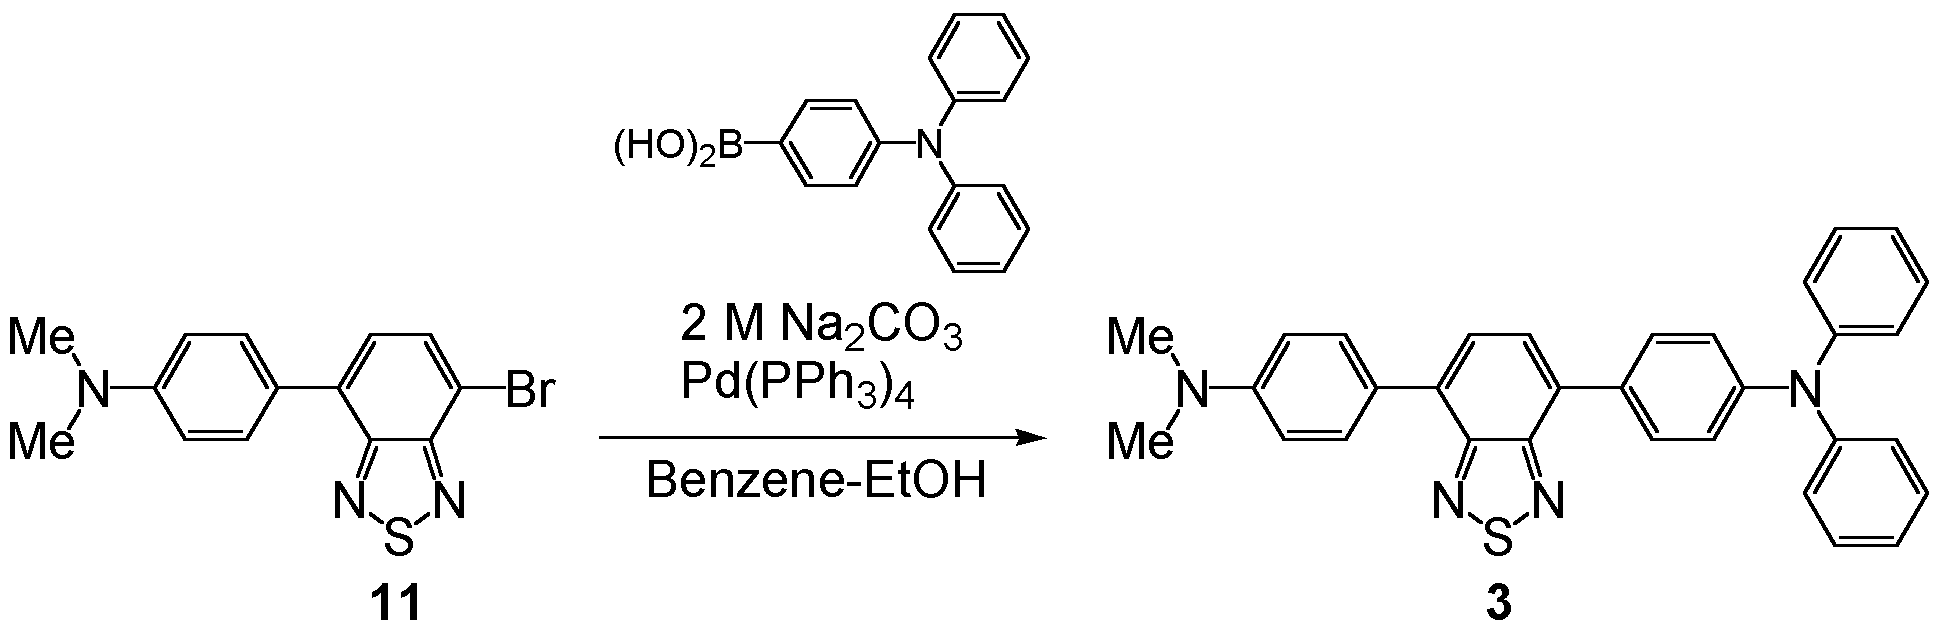


**4-(4-Dimethylaminophenyl)-7-(4-diphenylaminophenyl)-2,1,3-benzothiadiazole (3).** To a mixture of **11** (150 mg, 0.44 mmol) and tetrakis(triphenylphophine)palladium (15 mg, 0.013 mmol) in benzene (30 mL) were added ethanol (2 mL) solution of 4-(diphenylamino)phenylboronic acid(155 mg, 0.53 mmol) and 2 M sodium carbonate solution (20 mL) at 60 oC under an argon atmosphere. After the mixture was heated at 85 oC for 12 h, the reaction mixture was poured into water (150 mL) and extracted with toluene (30 mL x 3). The combined organic layers were evaporated in vacuo to dryness after dried over anhydrous magnesium sulfate. The residue was purified by silica gel column chromatography (KANTO 60N) eluting with toluene to give **3** in 73% yield (162 mg, 0.32 mmol) as orange powder. An analytical sample was obtained by gel permeation chromatography eluting with chloroform: mp 245-247 oC; IR (KBr) max 1610, 1590, 1489, 1349, 1282, 1197, 887, 813 cm-1; 1H NMR (CDCl3) 3.05 (s, 6 H, CH3), 6.89 (d, *J* = 8.6 Hz, 2 H, ArH), 7.05 (t, *J* = 7.3 Hz, 2 H, ArH), 7.16-7.32 (m, 10 H), 7.70 (d, *J* = 7.6 Hz, 1 H, ArH), 7.73 (d, *J* = 7.6 Hz, 1 H, ArH), 7.88 (d, *J* = 8.6 Hz, 2 H, ArH), 7.93 (d, *J* = 8.6 Hz, 2H, ArH); EI-MS (positive) 498 (M+). Anal. Calcd for C32H26N4S: C, 77.08; H, 5.26; N, 11.24. Found: C, 76.81; H, 5.28; N, 11.16.


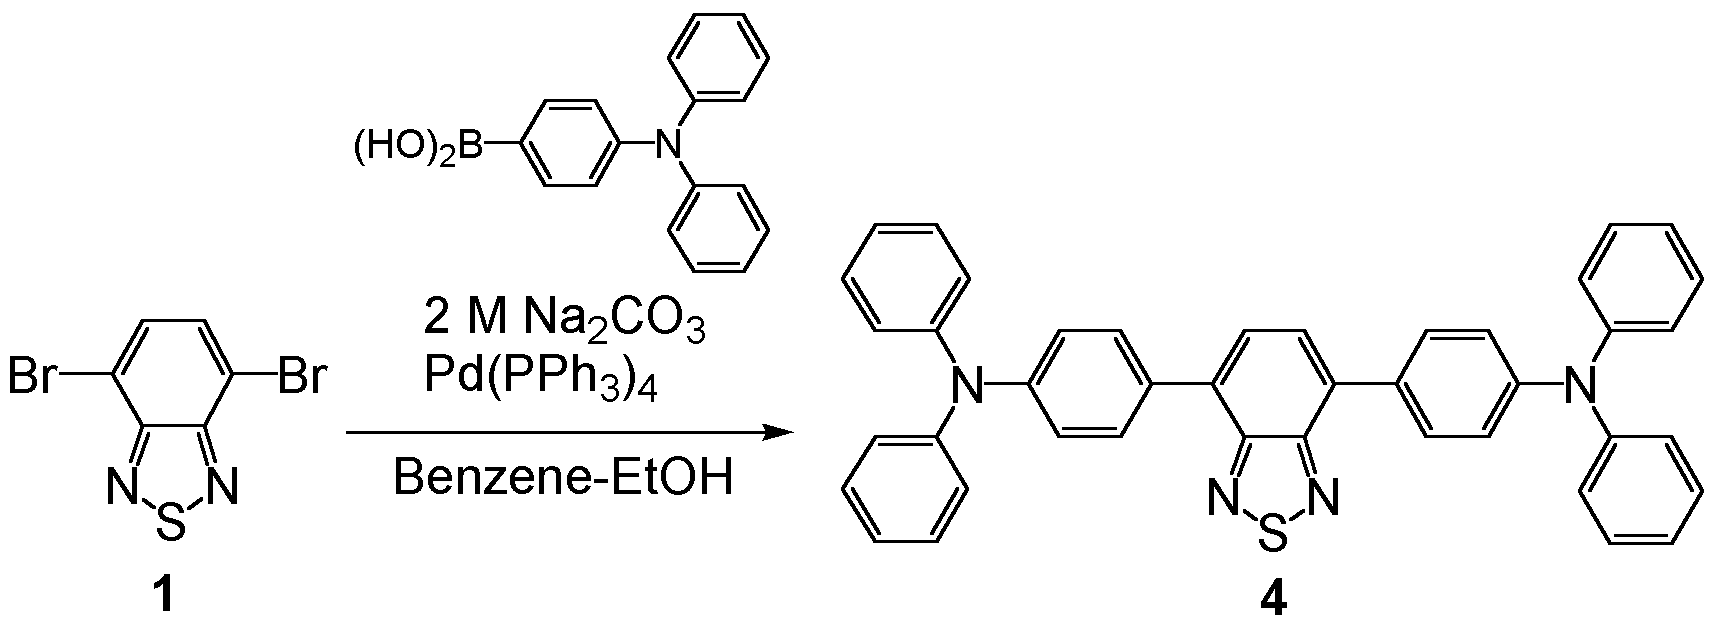


**4,7-Bis(4-diphenylaminophenyl)-2,1,3-benzothiaziazole (4).** To a mixture of **1** (46 mg, 0.16 mmol) and tetrakis(triphenylphophine)palladium (5.5 mg, 0.0048 mmol) in benzene (20 mL) were added ethanol (3 mL) solution of 4-(diphenylamino)phenylboronic acid (112 mg, 0.18 mmol) and 2 M sodium carbonate solution (10 mL) at 60 oC under an argon atmosphere. After the mixture was heated at 85 oC for 24 h, the reaction mixture was poured into water (50 mL) and extracted with toluene (30 mL x 3). The combined organic layers were evaporated in vacuo to dryness after dried over anhydrous magnesium sulfate. The residue was separated by silica gel column chromatography (KANTO 60N) eluting with chloroform/*n*-hexane (1:2, v/v) to give orange powder (50 mg), which was the mixture of **4** and 4-bromo-7-(4-diphenylaminophenyl)-2,1,3-benzothiadiazole. To a mixture of this orange powder (50 mg) and tetrakis(triphenylphophine)palladium (3.8 mg, 0.0033 mmol) in benzene (15 mL) were added ethanol (1 mL) solution of 4-(diphenylamino)phenylboronic acid (124 mg, 0.21 mmol) and 2 M sodium carbonate solution (7 mL) at 60 oC under an argon atmosphere. After the mixture was heated at 85 oC, the reacion mixture was poured into water (50 mL) and extracted with toluene (20 mL x 3). The combined organic layers were evaporated in vacuo to dryness after dried over anhydrous magnesium sulfate. The residue was purified by silica gel column chromatography (KANTO 60N) eluting with chloroform/*n*-hexane (1:2, v/v) to give **4c** in 53% yield (52 mg, 0.084 mmol) as red powder. An analytical sample was obtained by gel permeation chromatography eluting with chloroform: mp 236-238 oC; IR (KBr) max 1590, 1513, 1484, 1328, 1278, 825, 754 cm-1; 1HNMR (CDCl3) δ 7.06 (t, *J* = 8.5 Hz, 4 H, ArH), 7.17-7.32 (m, 20 H, ArH), 7.74 (s, 2 H, ArH), 7.88 (d, *J* = 8.5 Hz, 4 H, ArH); FAB-MS (NBA, positive) 622 (M+). Anal. Calcd for C42H30N4S: C, 81.00; H, 4.86; N, 9.00. Found: C, 80.79; H, 4.87; N, 9.02.


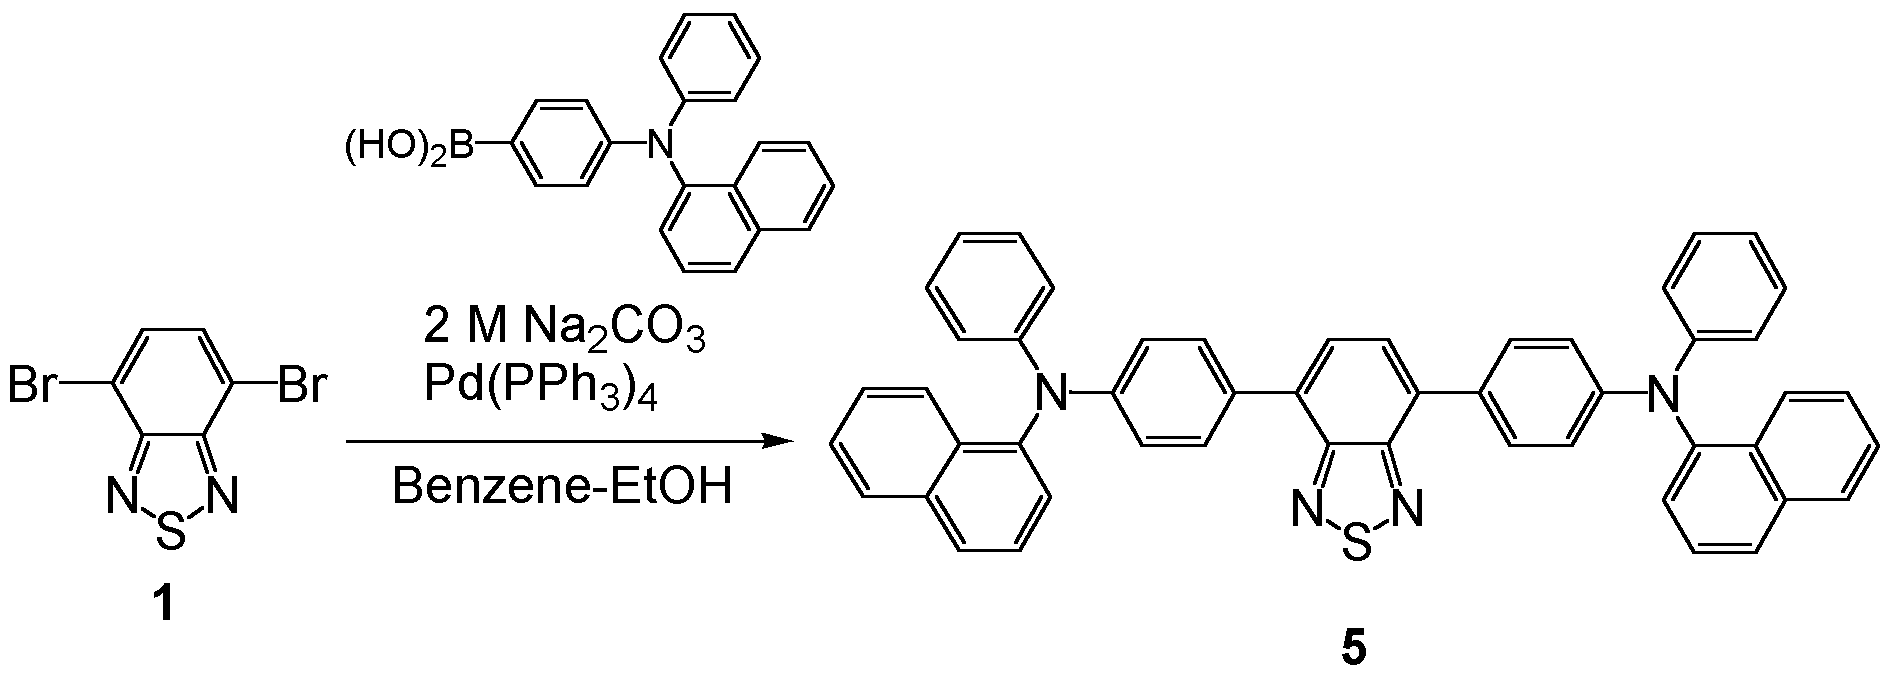


**4,7-Bis{4-[*N*-(1-naphthyl)-*N*-phenylamino]phenyl}-2,1,3-benzothiadiazole (5).** To a mixture of **1** (197 mg, 0.67 mmol) and tetrakis(triphenylphosphine)palladium (23 mg, 0.020 mmol) in benzene (20 mL) were added ethanol (2 mL) solution of 4-[*N*-(1-naphthyl)-*N*-phenylamino]phenylboronic acid (250 mg, 0.74 mmol) and aqueous 2 M sodium carbonate solution (10 mL) at 60 oC under an argon atmosphere. After the mixture was heated at 85 oC for 12 h, the reaction mixture was poured into water (100 mL) and extracted with toluene (30 mL x 3). The combined organic layers were dried over anhydrous magnesium sulfate and evaporated in vacuo to dryness. The residue was separated by silica gel column chromatography eluting with chloroform to give orange powder (330 mg), which was the mixture of 4-bromo-7-{4-[*N*-(1-naphthyl)-*N*-phenylamino]phenyl}-2,1,3-benzothiadiazole and **5**. To a mixture of this orange powder (330 mg) and tetrakis(triphenylphosphine)palladium (23 mg, 0.020 mmol) in benzene (30 mL) were added ethanol (2 mL) solution of 4-[*N*-(1-naphthyl)-*N*-phenylamino]phenylboronic acid (294 mg, 0.87 mmol) and aqueous 2 M sodium carbonate solution (15 mL) at 60 oC under an argon atmosphere. After the mixture was heated at 85 oC for 12 h, the reaction mixture was poured into water (150 mL) and extracted with toluene (30 mL x 3). The combined organic layers were dried over anhydrous magnesium sulfate and evaporated in vacuo to dryness. The residue was purified by silica gel column chromatography (KANTO 60N) eluting chloroform/*n*-hexane (3:2, v/v) to give **5** in 73% yield (352 mg, 0.49 mmol) as red powder. An analytical sample was obtained by gel permeation chromatography eluting with chloroform: IR (KBr) max 1592, 1508, 1480, 1279, 811, 747 cm-1; 1H NMR (CDCl3) 7.10 (t, *J* = 7.3 Hz, 2 H, ArH), 7.22-7.45 (m, 18 H, ArH), 7.54-7.66 (m, 4 H, ArH), 7.75-7.80 (m, 4 H, ArH), 7.78 (s, 2 H, ArH), 7.92 (d, *J* = 8.6 Hz, 4 H, ArH); FAB-MS (NBA, positive) 722 (M+). Anal. Calcd for C50H34N4S·0.1CHCl3: C, 81.89; H, 4.68; N, 7.62. Found: C, 82.18; H, 4.85; N, 7.35.


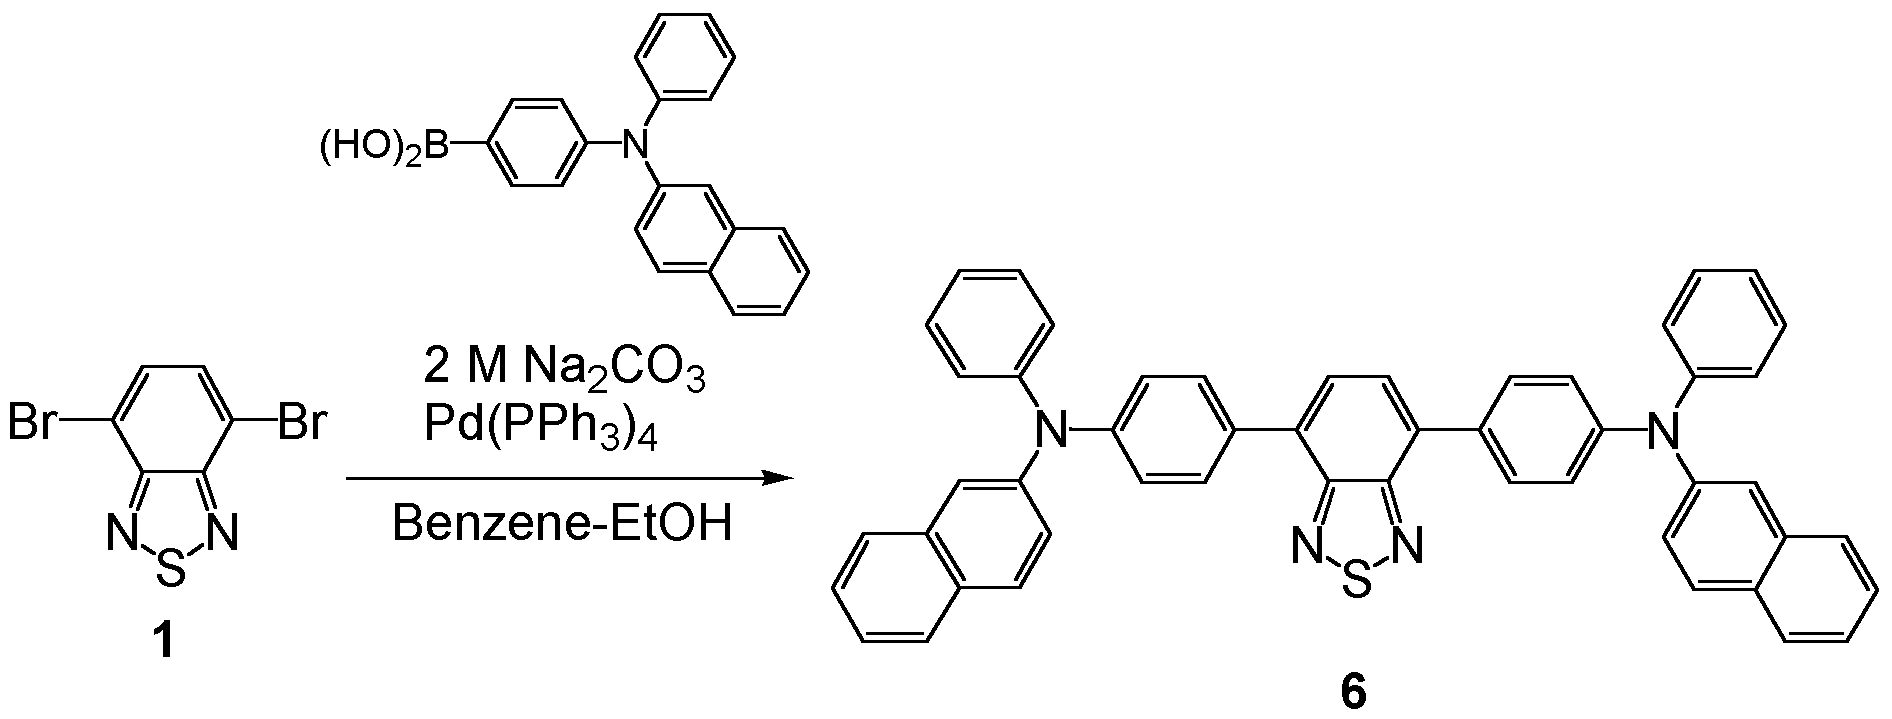


**4,7-Bis{4-[*N*-(2-naphthyl)-*N*-phenylamino]phenyl}-2,1,3-benzothiadiazole (6).** To a mixture of **1** (289 mg, 0.98 mmol) and tetrakis(triphenylphosphine)palladium (34 mg, 0.029 mmoll) in benzene (25 mL) were added ethanol (2 mL) solution of 4-[*N*-(2-naphthyl)-*N*-phenylamino]phenylboronic acid (365 mg, 1.08 mmol) and aqueous 2 M sodium carbonate solution (12 mL) at 60 oC under an argon atmosphere. After the mixture was heated at 85 oC for 12 h, the reaction mixture was poured into water (100 mL) and extracted with toluene (30 mL x 3). The combined organic layers were dried over anhydrous magnesium sulfate and evaporated in vacuo to dryness. The residue was separated by silica gel column chromatography eluting with chloroform to give orange powder (352 mg), which was the mixture of 4-bromo-7-{4-[*N*-(1-naphthyl)-*N*-phenylamino]phenyl}-2,1,3-benzothiadiazole and **6**. To a mixture of this orange powder (352 mg) and tetrakis(triphenylphosphine)palladium (34 mg, 0.029 mmol) in benzene (30 mL) were added ethanol (2 mL) solution of 4-[*N*-(2-naphthyl)-*N*-phenylamino]phenylboronic acid (432 mg, 1.27 mmol) and aqueous 2 M sodium carbonate solution (15 mL) at 60 oC under an argon atmosphere. After the mixture was heated at 85 oC for 12 h, the reaction mixture was poured into water (150 mL) and extracted with toluene (30 mL x 3). The combined organic layers were dried over anhydrous magnesium sulfate and evaporated in vacuo to dryness. The residue was purified by silica gel column chromatography (KANTO 60N) eluting chloroform/*n*-hexane (3:2, v/v) to give **6** in 53% yield (398 mg, 0.52 mmol) as red powder. An analytical sample was obtained by gel permeation chromatography eluting with chloroform: IR (KBr) max 1592, 1508, 1480, 1279, 811, 747 cm-1; 1H NMR (CDCl3) 7.10 (t, *J* = 7.3 Hz, 2 H, ArH), 7.22-7.45 (m, 18 H, ArH), 7.54-7.66 (m, 4 H, ArH), 7.75-7.80 (m, 4 H, ArH), 7.78 (s, 2 H, ArH), 7.92 (d, *J* = 8.6 Hz, 4 H, ArH); FAB-MS (NBA, positive) 722 (M+). Anal. Calcd for C50H34N4S·0.1CHCl3: C, 81.89; H, 4.68; N, 7.62. Found: C, 81.86; H, 4.53; N, 7.63.


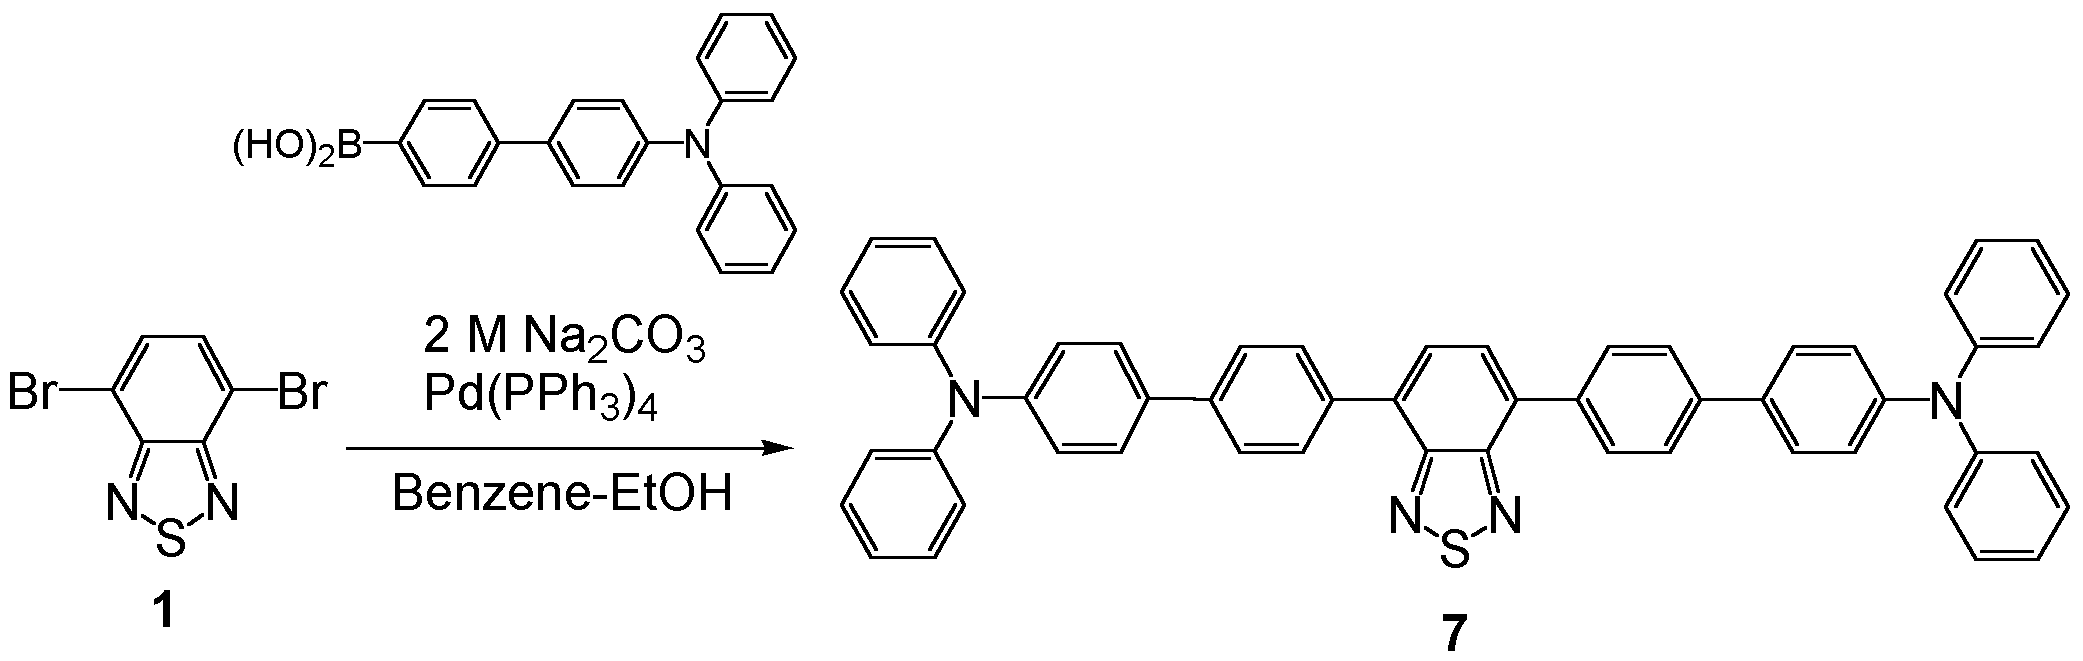


**4,7-Bis(4’-diphenylaminobiphenyl-4-yl)-2,1,3-benzothiadizle (7).** To a mixture of **1** (100 mg, 0.34 mmol) and tetrakis(triphenylphophine)palladium (12 mg, 0.010 mmol) in benzene (20 mL) were added ethanol (2 mL) solution of 4’-diphenylamino-4-biphenylboronic acid (165 mg, 0.37 mmol) and aqueous 2 M sodium carbonate solution (12 mL) at 60 oC under an argon atmosphere. After the mixture was heated at 85 oC for 12 h, the reaction mixture was poured into water (80 mL) and extracted with toluene (30 mL x 3). The combined organic layers were evaporated in vacuo to dryness after dried over anhydrous magnesium sulfate. The residue was separated by silica gel column chromatography (KANTO 60N) eluting with chloroform/*n*-hexane (1:1, v/v) to give orange powder (103 mg), which was the mixture of **7** and 4-bromo-7-(4’-diphenylaminophenyl-4-yl)-2,1,3-benzothiadiazole. To a mixture of this orange powder (103 mg) and tetrakis(triphenylphophine)palladium (12 mg, 0.010 mmol) in benzene (30 mL) were added ethanol (2 mL) solution of 4’-diphenylamino-4-biphenylboronic acid (161 mg, 0.44 mmol) and aqueous 2 M sodium carbonate solution (15 mL) at 60 oC under an argon atmosphere. After the mixture was heated at 85 oC for 12 h, the reaction mixture was poured into water (150 mL) and extracted with toluene (30 mL x 3). The combined organic layers were evaporated in vacuo to dryness after dried over anhydrous magnesium sulfate. The residue was purified by silica gel column chromatography (KANTO 60N) eluting with chloroform/*n*-hexane (1:1, v/v) to give **7** in 18% yield (48 mg, 0.062 mmol) as orange powder. An analytical sample was obtained by gel permeation chromatography eluting with chloroform: mp 220-222 oC; IR (KBr) max 3030, 1590, 1480, 1329, 1280, 816, 754 cm-1; 1H NMR (CDCl3) 7.05 (t, *J* = 7.1 Hz, 4 H, ArH), 7.14-7.33 (m, 20 H, ArH), 7.57 (d, *J* = 8.9 Hz, 4 H, ArH), 7.76 (d, *J* = 8.4 Hz, 4 H, ArH), 7.86 (s, 2 H, ArH), 8.06 (d, *J* = 8.4 Hz, 4 H, ArH); FAB-MS (NBA, positive) 774 (M+). Anal. Calcd for C54H38N4S: C, 83.69; H, 4.94; N, 7.23. Found: C, 83.70; H, 4.93; N, 7.26.


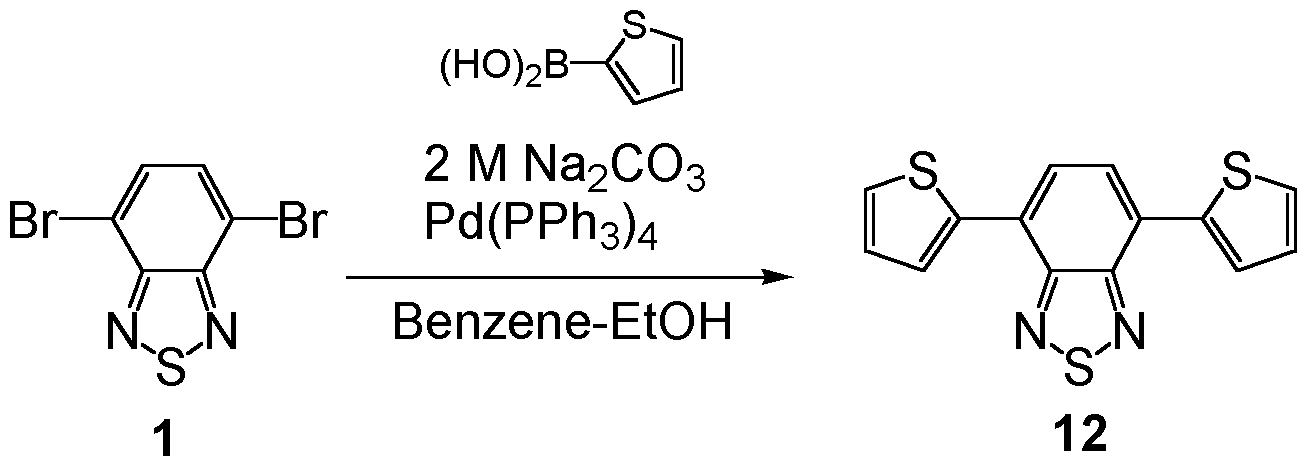


**4,7-Di(2-thienyl)-2,1,3-benzothiadiazole (12)**. To a mixture of **1** (2.95 g, 10 mmol) and tetrakis(triphenylphosphine)palladium (1.00 g, 0.87 mmol) in benzene (100 mL) were added ethanol (25 mL) solution of 2-thienylboronic acid (4.05 g, 32 mmol) and aqueous 2 M sodium carbonate solution (50 mL) at 60 oC under an argon atmosphere. After the mixture was heated at 85 oC for 15 h, the reaction mixture was concentrated in vacuo to remove benzene and extracted with dichloromethane (100 mL x 2). The combined organic layers were washed with water (100 mL x 2), dried over anhydrous magnesium sulfate and evaporated in vacuo to dryness. The residue was purified by recrystallization from *n*-hexane to give **12** in 81% yield (2.46 g 8.1 mmol) as red needles: mp 128-129 oC [lit.2 118 oC]; IR (KBr) max 1579, 1510, 1478, 1420, 1377, 1214, 1074, 875, 823, 811, 706, 561, 507, 472, 453, 444, 437, 424 cm-1; 1H NMR (CDCl3)  7.22 (dd, *J* = 3.6, 5.0 Hz, 2 H, ArH), 7.47 (dd, *J* = 1.0, 5.0 Hz, 2 H, ArH), 7.89 (s, 2 H, ArH), 8.13 (dd, *J* = 1.0, 3.6 Hz, 2 H, ArH); Anal. Calcd for C14H8N2S3: C, 55.97; H, 2.68; N, 9.32. Found: C, 55.94; H, 2.62; N, 9.30.


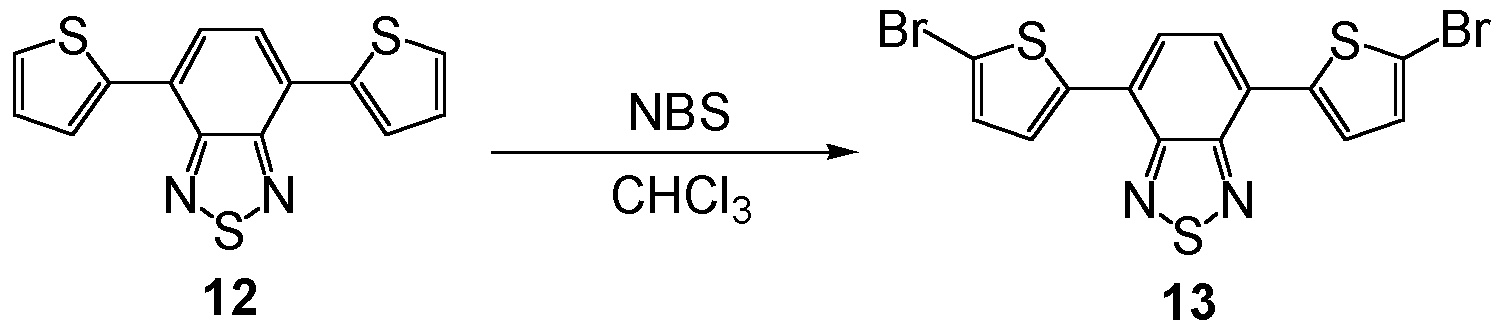


**4,7-Bis(5-bromo-2-thienyl)-2,1,3-benzothiadiazole (13)**. A mixture of **12** (100 mg, 0.33 mmol) and NBS (125 mg, 0.7 mmol) in chloroform was stirred at room temperature for 48 h under an argon atmosphere. The precipitates were collected by filtration and washed with water, methanol, and chloroformto give **13** in 73% yield (110 mg, 0.24 mmol) as deep red powder. An analytical sample was obtained by recrystallization from chloroform:mp 256-258 oC; IR (KBr) max 1484, 1421, 1215, 1074, 970, 875, 834, 792, 511, 462, 418 cm-1; 1H NMR (CDCl3)  7.16 (d, *J* = 4.0 Hz, 2 H, ArH), 7.80 (s, 4 H, ArH), 7.81 (d, *J* = 4.0 Hz, 2 H, ArH). Anal. Calcd for C14H6Br2N2S3: C, 36.70; H, 1.32; N, 6.11. Found: C, 36.40; H, 1.38; N, 6.05.


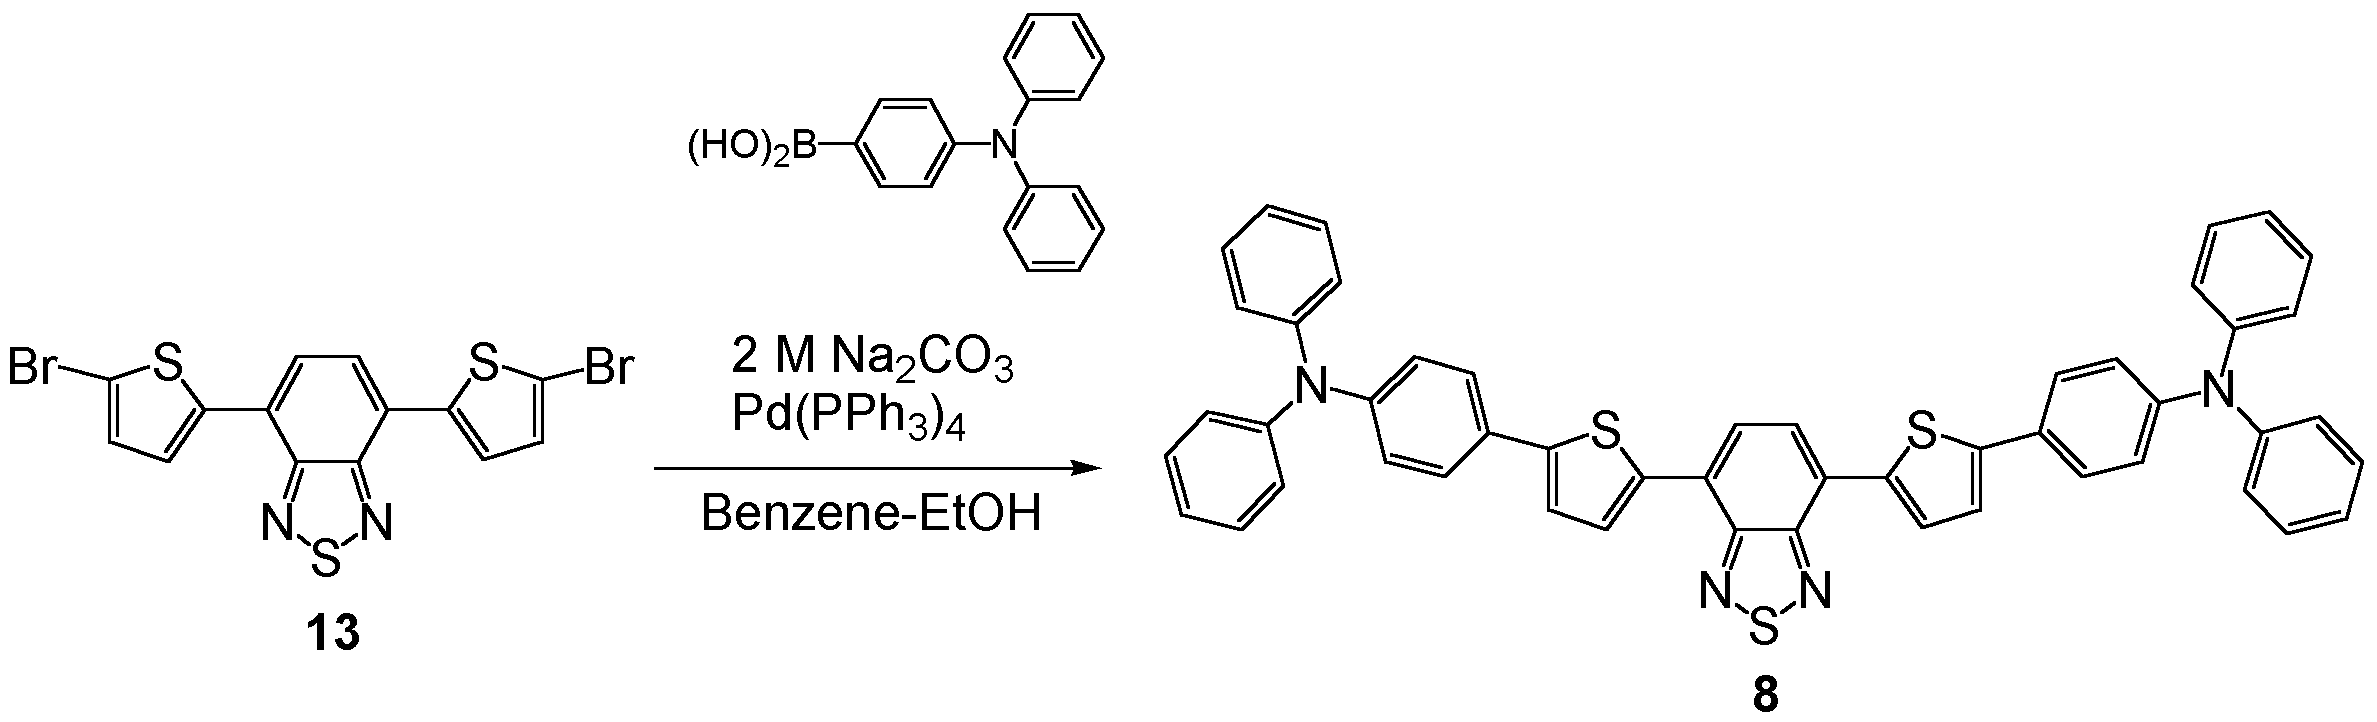


**4,7-Bis{5-[4-(diphenylamino)phenyl]-2-thienyl}-2,1,3-benzothiadiazole (8).** To a mixture of **13** (115 mg, 0.25 mmol) and tetrakis(triphenylphosphine)palladium (25 mg, 0.25 mmol) in benzene (4 mL) were added ethanol (1 mL) solution of 4-(diphenylamino)phenylboronic acid and aqueous 2 M sodium carbonate solution (2 mL) at 70 oC under an argon atmosphere. After the mixture was heated at 85 oC for 24 h, the reaction mixture was concentrated in vacuo to remove benzene. The residue was extracted with chloroform (50 mL x 3), dried over anhydrous magnesium sulfate, and evaporated in vacuo to dryness. The residue was recrystallized from chloroform/*n*-hexane and purified by gel permeation chromatography eluting with chloroform to give **8** in 33% yield (65 mg, 0.08 mmol) as red powder: mp 262-264 oC; IR (KBr) max 1590, 1483, 1448, 1325, 1279, 835, 795, 755, 695, 515 cm-1; 1H NMR (CDCl3)  7.00-7.18 (m, 20 H, ArH), 7.27-7.37 (m, 6 H, ArH), 7.55 (d, *J* = 8.6 Hz, 4 H, ArH), 7.86 (s, 2 H, ArH), 8.11 (d, *J* = 4.0 Hz, 2 H, ArH); FAB-MS (NBA, positive) 786 (M+). Anal. Calcd for C50H34N4S3·0.15CHCl3: C, 74.83; H, 4.28; N, 6.96. Found: C, 74.82; H, 4.26; N, 7.05.


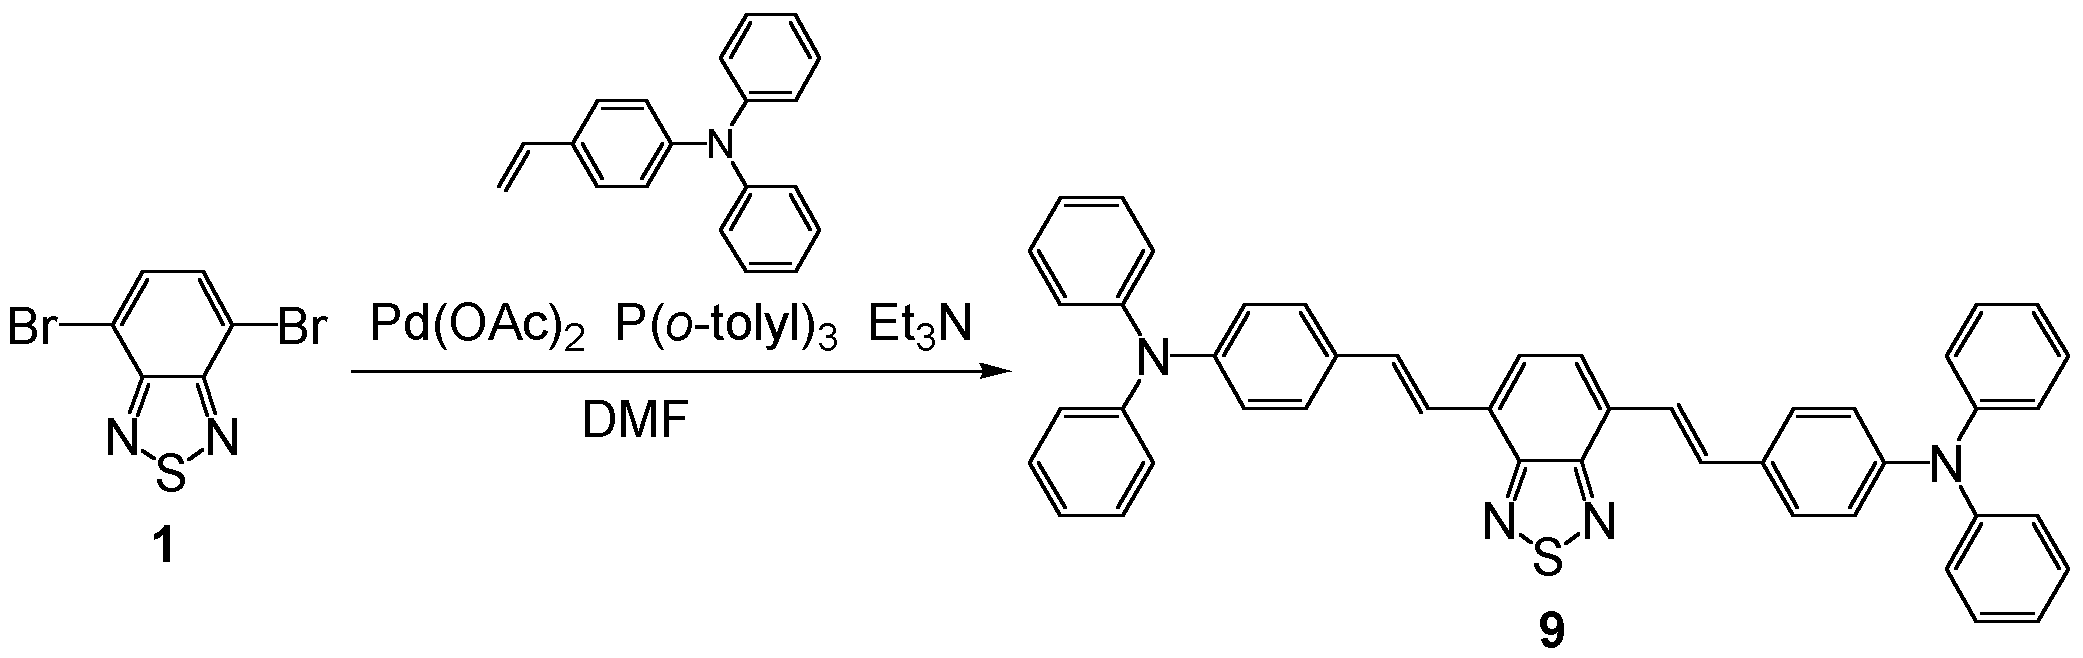


**4,7-Bis{2-[4-(diphenylamino)phenyl]ethenyl}-2,1,3-benzothiadiazole (9).** To a solution of **1** (74 mg, 0.25 mmol), 4-diphenylaminostyrene (150 mg, 0.55 mmol) in triethylamine (1 mL) and DMF (15 mL) was added dropwise DMF (5 mL) solution of tri-*o*-tolylphosphine (3 mg, 0.01 mmol) and palladium acetate (2 mg, 0.005 mmol) at 80 oC under an argon atmosphere. After the mixture was heated at 110 oC for 12 h, the reaction mixture was poured into water (50 mL), and extracted with chloroform (40 mL x 3). The combined organic layers were neutralized with 1.2 N aqueous hydrochloric acid solution (20 mL), washed with brine (30 mL x 3), dried over anhydrous magnesium sulfate, and evaporated in vacuo to dryness. The residue was purified by silica gel column chromatography (KANTO 60N) eluting with chloroform/*n*-hexane (4:3, v/v) to give **9** in 17% yield (28 mg, 0.04 mmol) as red glass. An analytical sample was obtained by gel permeation chromatography eluting with chloroform: mp 196-198 oC; IR (KBr) max 1589, 1507, 1591, 1326, 1281, 1175, 963 cm-1; 1H NMR (CDCl3) 7.02-7.16 (m, 16 H, ArH), 7.27 (d, *J* = 7.3 Hz, 8 H, ArH), 7.29 (d, *J* = 8.6 Hz, 4 H, ArH), 7.52 (d, *J* = 8.6 Hz, 4 H, ArH), 7.54 (d, *J* = 16.2 Hz, 2 H, olefinic H), 7.65 (s, 2 H, ArH), 7.92 (d, *J* = 16.2 Hz, 2 H, olefinic H); FAB-MS (NBA, positive) 674 (M+). Anal. Calcd for C46H34N4S·0.03CHCl3: C, 81.49; H, 5.06; N, 8.26. Found: C, 81.41; H, 5.10; N, 8.21.


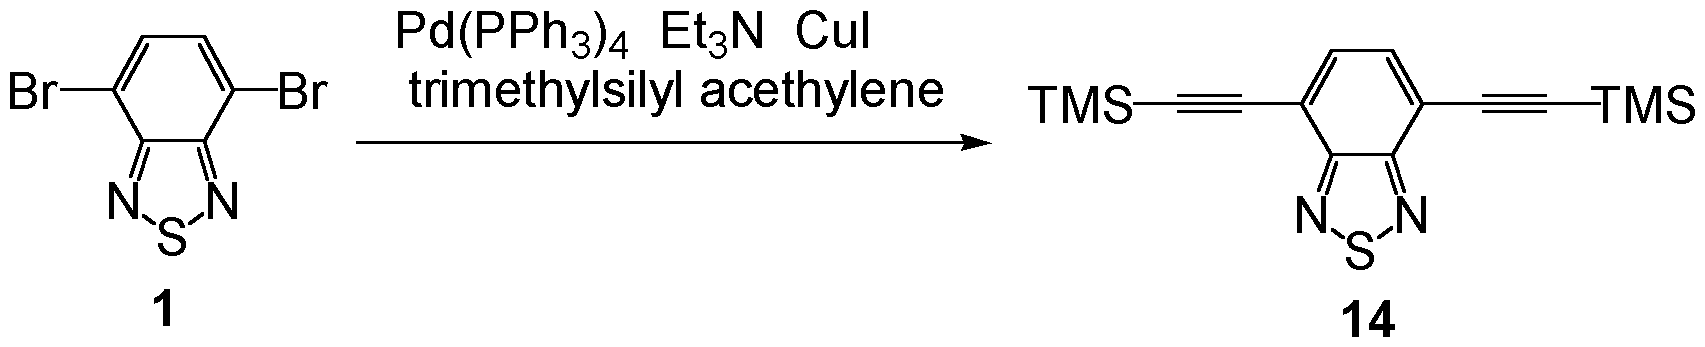


**4,7-Bis(trimethylsilylethynyl)-2,1,3-benzothiadiazole (14).** To a mixture of **1** (441 mg, 15 mmol) and trimethylsilyl acethylene (0.6 mL, 4.5 mmol) in triethylamine (25 mL) were added tetrakis(triphenylphosphine)palladium (35 mg, 0.03 mmol) and cupper iodide (I) (11 mg, 0.06 mmol) in pressure tube under an argon atmosphere. After the mixture was heated at 75 oC for 5 h, the reaction mixture was poured into cold water (100 mL) and extracted with dichloromethane (30 mL x 3). The combined organic layers were washed with water (50 mL x 2) and aqueous 1.2 N hydrochloric acid solution (30 mL), dried over anhydrous magnesium sulfate, and evaporated in vacuo to dryness. The residue was purified by silica gel chromatography (WAKO C-300) eluting with ether/*n*-hexane (1:1 v/v) to give **14** in 98% yield (460 mg, 14 mmol)as pale yellow powder. An analytical sample was obtained by recrystallization from cold methanol to give **14** as pale yellow plates: mp 117-118 oC; IR (KBr) max 2960, 2898, 2150 (C≡C), 1538, 1490, 1412, 1357, 1338, 1248, 1167, 1062, 1027 cm-1; 1H NMR (CDCl3)  0.33 (s, 18 H, CH3), 7.70 (s, 2 H, ArH); EI-MS (positive)328 (M+). Anal. Calcd for C16H20N2SSi2: C, 58.49; H, 6.14; N, 8.53. Found: C, 58.55; H, 6.18; N, 8.43.


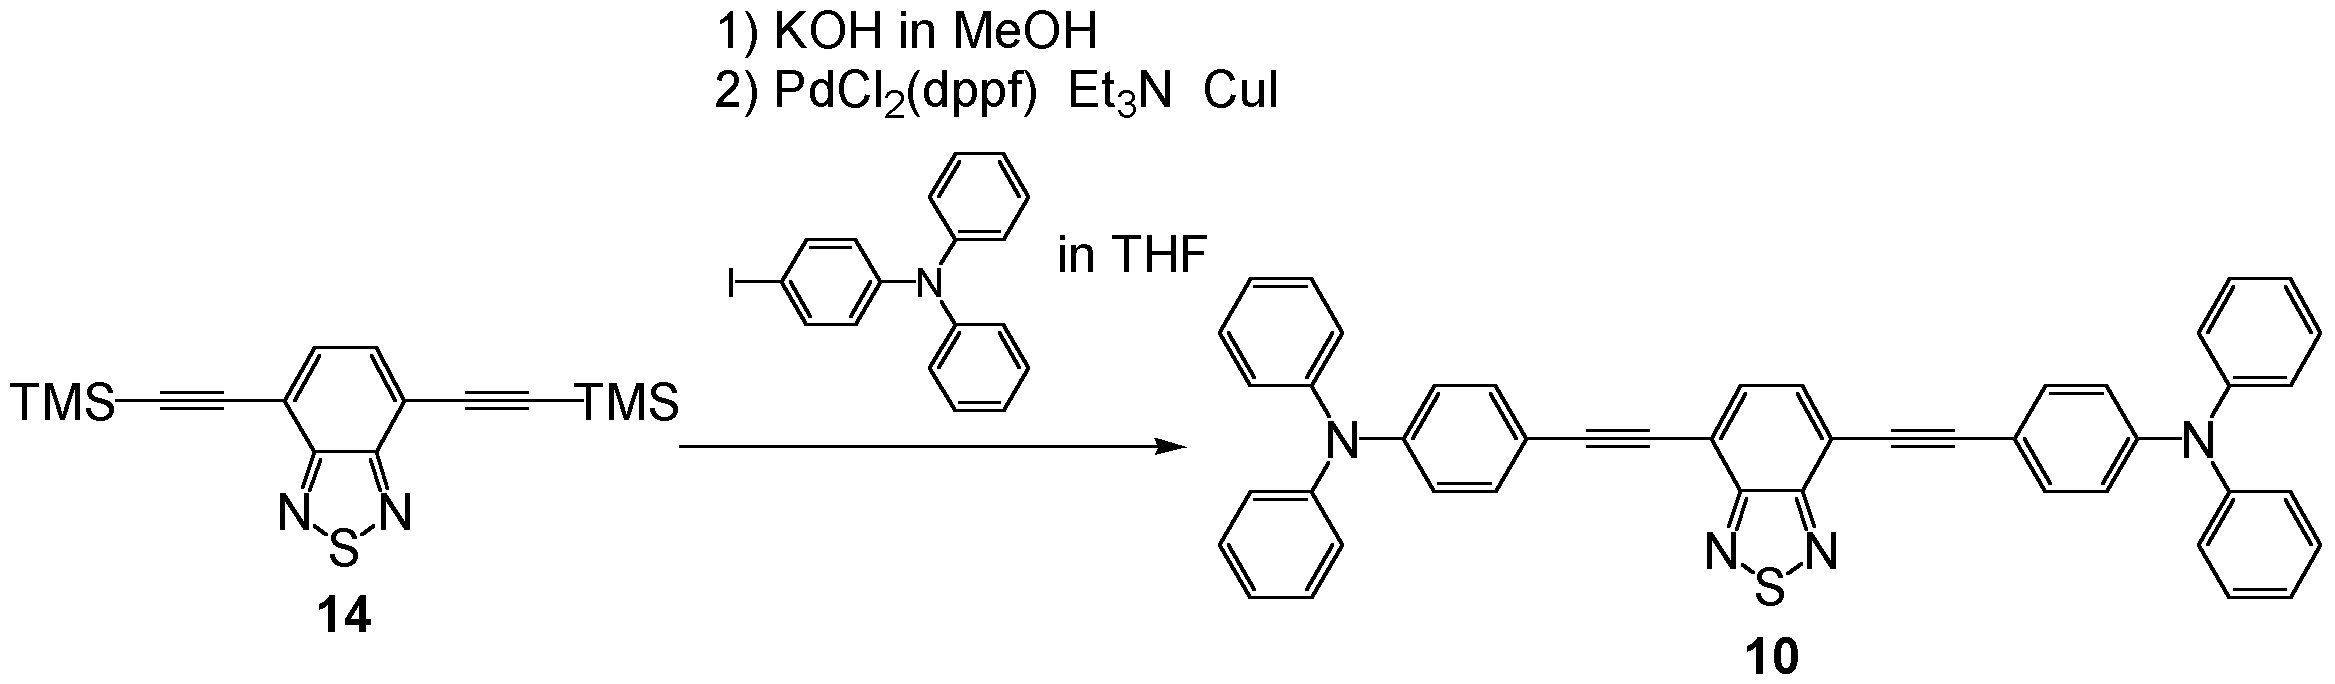


**4,7-Bis{2-[4-(diphenylamino)phenyl]ethynyl}-2,1,3-benzothiadiazole (10).** A mixture of **14** (180 mg, 0.54 mmol) in 1 N potassium hydroxide methanol solution (15 mL) was stirred at room temperature for 1 h. The reaction mixture was poured into water (40 mL) and extracted with chloroform (25 mL x 3). The combined organic layers were evaporated in vacuo to dryness after dried over anhydrous magnesium sulfate to give 4,7-diethynyl-2,1,3-benzothiadiazole (91 mg, 0.49 mmol) as brown powder. To a solution of this brown powder, 4-diphenylaminoiodobenzene (400 mg, 1.08 mmol), and triethylamine (2 mL) in THF (5 mL) was added diphenylphosphinoferocene palladium dichloride (7 mg, 0.01 mmol) and cupper iodide (7 mg, 0.04 mmol) under an argon atmosphere. After the mixture was stirred at room temperature for 1.5 h, the reaction was poured into water (50 mL) and extracted with dichloromethane (30 mL x 3). The combined organic layers were neutralized with 1.2 N hydrochloric acid (20 mL), washed with brine (20 mL x 3), dried over anhydrous magnesium sulfate, and evaporated in vacuo to dryness. The residue was purified by column chromatography (KANTO 60N) eluting with dichloromethane/*n*-hexane (3:2, v/v) to give **10** in 11% yield (39 mg, 0.058 mmol) as red powder: mp 249-251 oC; IR (KBr) max 2198 (C≡C), 1589, 1557, 1510, 1490, 1317, 1287, 1172, 824, 753 cm-1; 1H NMR (CDCl3)  7.03 (d, *J* = 8.9 Hz, 4 H, ArH), 7.12 (t, *J* = 8.6 Hz, 12 H, ArH), 7.26-7.32 (m, 8 H, ArH), 7.50 (d, *J* = 8.9 Hz, 4 H, ArH), 7.73 (s, 2 H, ArH); FAB-MS (NBA, positive)670 (M+). Anal. Calcd for C46H30N4S·0.1CHCl3: C, 81.09; H, 4.44; N, 8.20. Found: C, 81.05; H, 4.48; N, 8.07.

**Measurement of two-photon absorption cross-sections**

Two-photon absorption cross-sections were measured by using an open aperture Z-scan method with femtosecond pulses that were generated from an 1 kHz repetition Ti:sapphire regenerative amplifier system (Quantronix Integra). The pulse width is 120 fs and the spatial profiles were characterized by knife-edge method and can be a Gaussian profile. The experimental setup for open aperture Z-scan measurements is schematically shown in S-Fig 1. The laser beam was split into two parts. One of them was monitored by a Si P-I-N photo-detector (MODEL 818-SL, New Focus) as an intensity reference and the rest was used for the transmittance measurement. After passing through an f = 50 cm lens, the laser beam was focused and passed through a quartz cell filled with the solution sample. The position of the sample cell could be varied along the laser-beam direction (z axis), so the local power density within the sample cell could be changed under a constant laser power level. The laser power level was controlled at about a 10mW by inserting ND filters and the power density was changed from 1 to 50 GW/cm2. The thickness of the cell is 1 cm. The transmitted laser beam from the sample cell was then detected by same type of the photo-detector as used for reference monitoring. Same measurements were done for a cell filled with the solvent alone. The transmittance can be acquired by dividing the solution-transmitted intensity by the solvent-transmitted intensity.

The excitation power dependence of the transmittance was analyzed by the following method.3 The beam intensity change along the propagation direction (z-axis) can be described as

(1)

where  is the attenuation coefficient that is due to linear absorption and scattering and  is the nonlinear absorption coefficient that is due to TPA. Within the approximation of small linear absorption, i.e., *z* << 1, The solution of Eq. (1) is

(2)

and the transmittance of the nonlinear medium can be written as

(3)

where I(0) is the initial intensity, T0 is the linear transmittance independent of I(0) and Ti is the nonlinear transmittance dependent on I(0). If the spatial beam profile can be assumed a Gaussian, the nonlinear transmittance Ti should be rewritten as4

(4)

By fitting the experimental nonlinear transmittance data Ti with Eq. (4), one can determine the nonlinear absorption coefficient for a given input intensity I(0)=I0 and a given sample thickness z=*L*. After obtaining the nonlinear absorption coefficient , the TPA cross section of one solute molecule (in units of cm4.s/photon) can be determined by using the following relationship:

(5)

where *NA* is the Avogadro constant, *d* is the concentration of the TPA compound in the solution (in units of M/L), *h* is the Planck constant, and  is the frequency of incident laser.

LS

D1

F1

F2

BS

S

F3

AP

D2

A1

A2

PC

L1

L2

OF

M

Ｃ

S-Fig 1. Experimental setup for two-photon absorption cross-section measurement : LS, light source; BS, beam splitter; F1, F2, F3, ND filters and color filters; L1, L2, lens; S, sample cell; D1, D2, detector; AP, open aperture; A1, A2, amplifier; PC, personal computer; OF, optical fiber; M, monochromator; C, CCD detector.


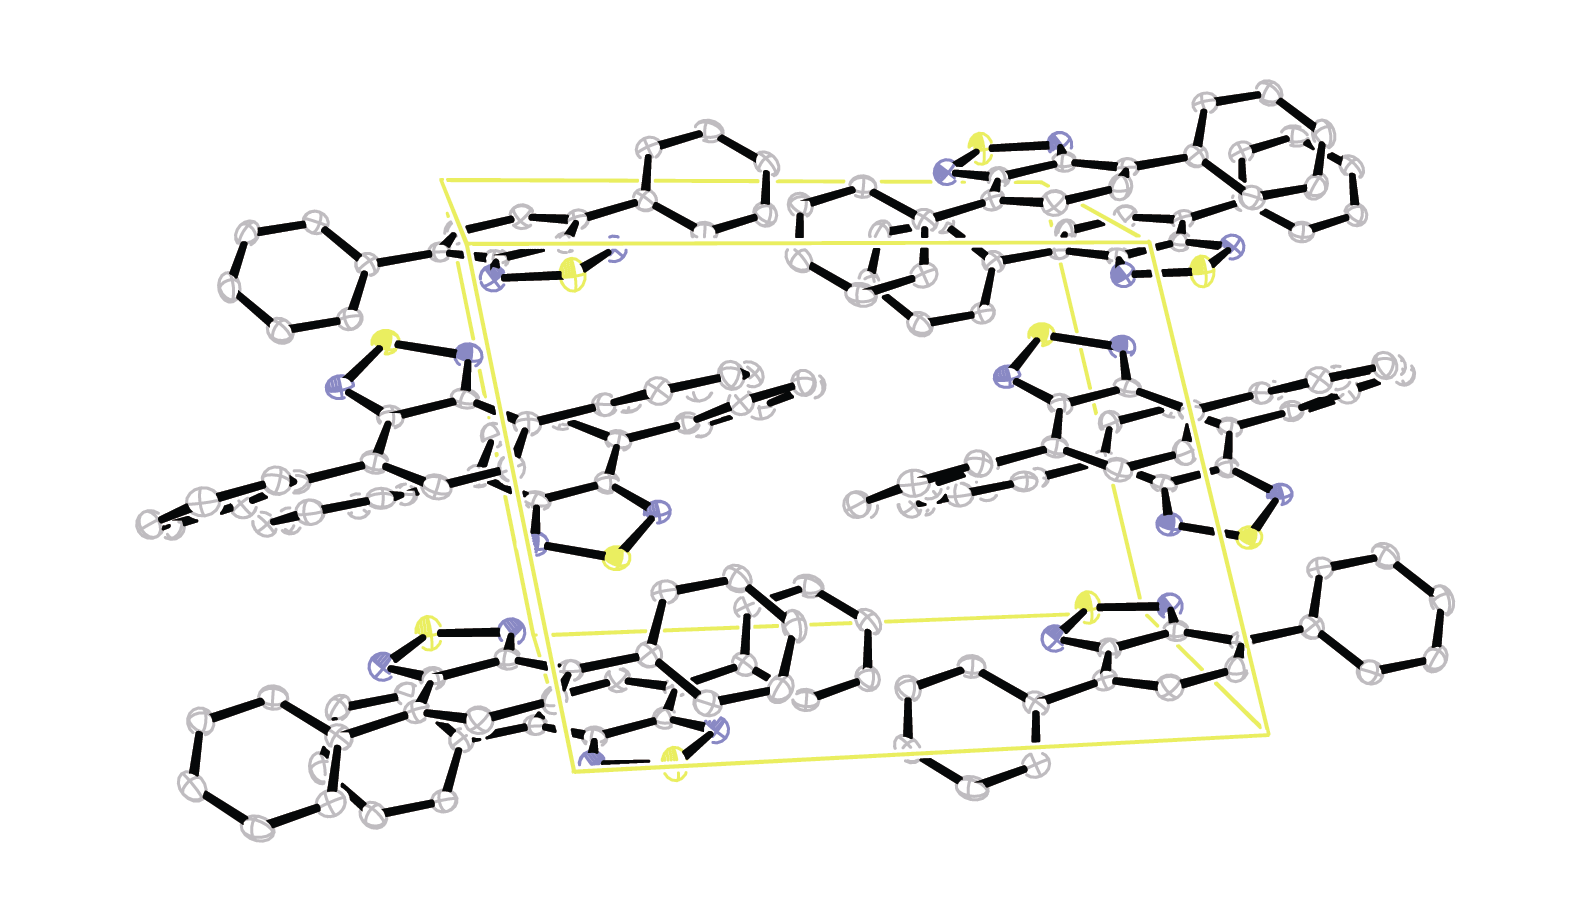


S-Fig 2. ORTEP representation of 4,7-diphenyl-2,1,3-benzothiadiazole in the unit cell.


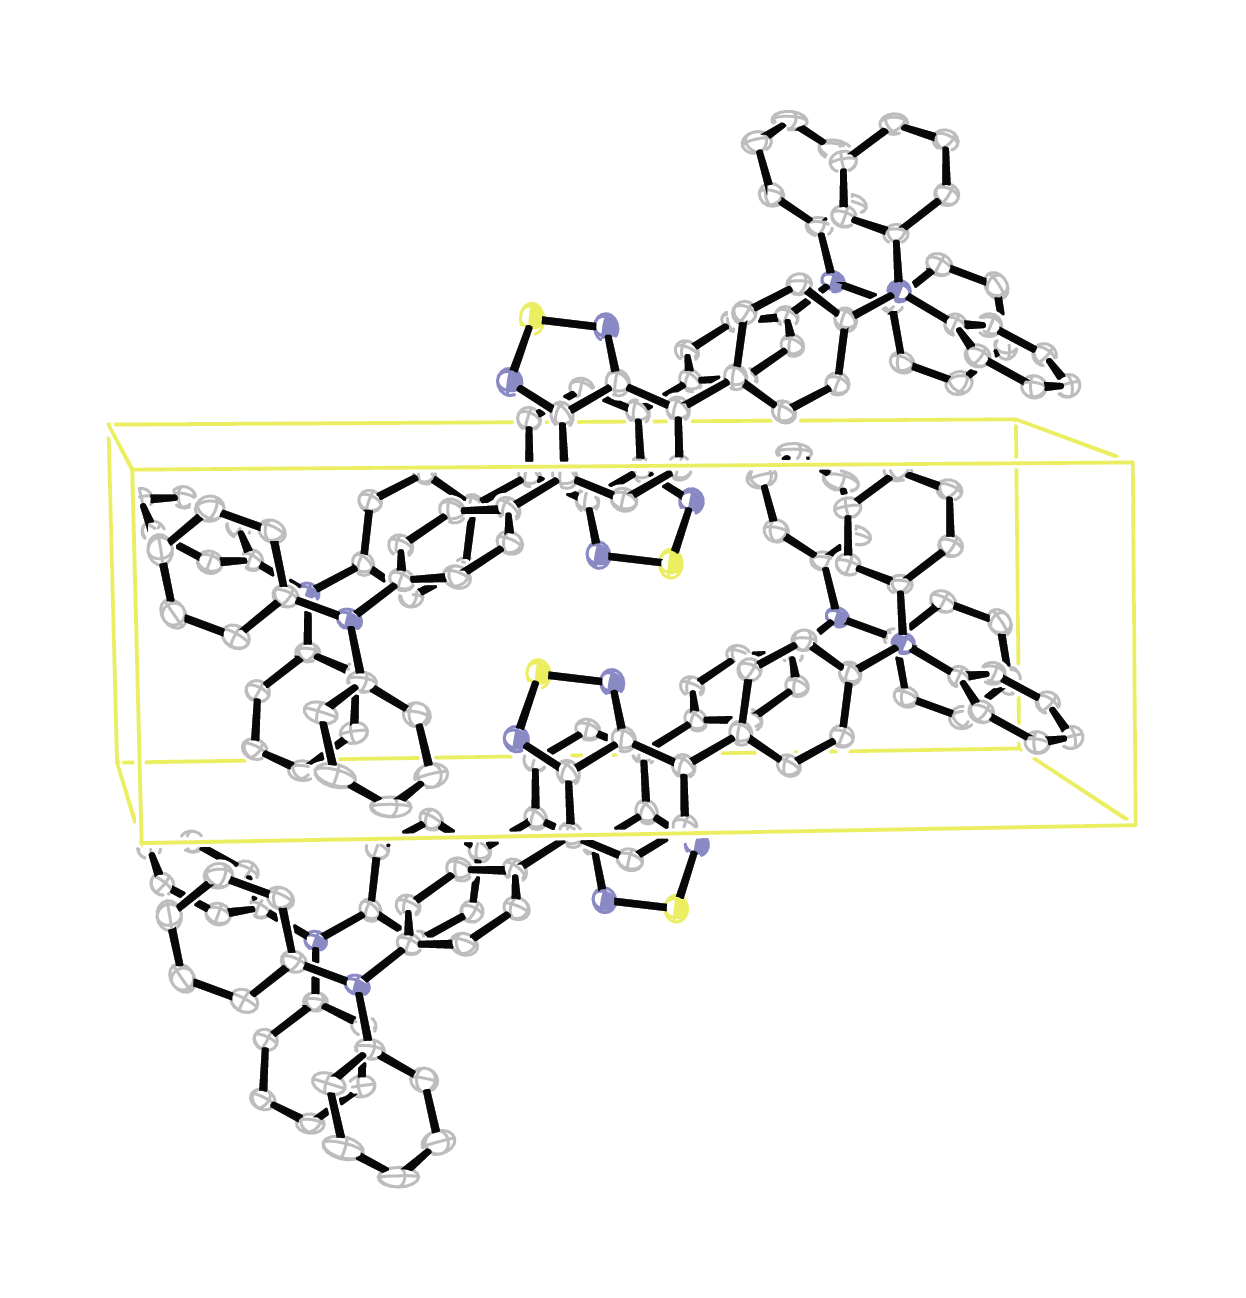


S-Fig 3. ORTEP representation of **4** in the unit cell.

**References**

1 K. Pilgram, M. Zupan and R. Skiles, *J. Heterocycl. Chem.,* 1970, **7**, 629-633.

2 H. A. M. van Mullekom, J. A. J. M. Vekemans and E. W. Meijer, *Chem. Eur. J.,* 1998, **4**, 1235-1243.

3 G. S. He, L Yuan, N. C. Jayant, D. Bhawalkar, P. N. Prasad, L. L. Brott, S. J. Clarson and B. A. Reinhardt, *J. Opt. Soc. Am. B,* 1997, **14**, 1079-1087.

4 L. W. Tutt and T. F. Boggess, *Prog. Quantum Electron,* 1993, **17**, 299-338.
